# Supplementary material
Source: HighWire-hosted journal article supplement (https://www.canjsurg.ca/highwire/filestream/96779/field_highwire_adjunct_files/0/cjs-023410-1-at.pdf)
Supplement: cjs-023410-1-at.pdf [file cjs-023410-1-at.pdf]

**Appendix 1** to Edwards JP, Kelly EJ, Lin Y, et al. Meta-analytic comparison of randomized and nonrandomized studies in breast cancer surgery. *Can J Surg* 2012.

DOI: 10.1503/cjs.023410

Copyright © 2012 The Author(s) or their employer(s). To receive this resource in an accessible format, please contact us at [cmajgroup@cmaj.ca](mailto:cmajgroup@cmaj.ca).

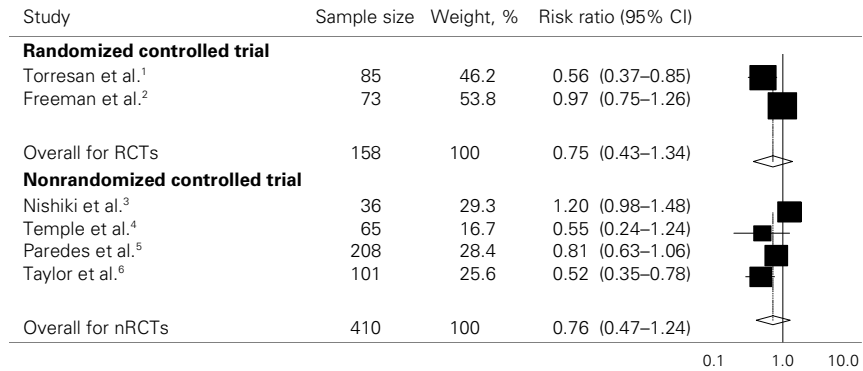

**Fig. S1.** Relative risk of sensory deficit after intercostobrachial nerve dissection (control surgery) or preservation (experimental surgery) in randomized (RCTs) and nonrandomized trials (nRCTs).

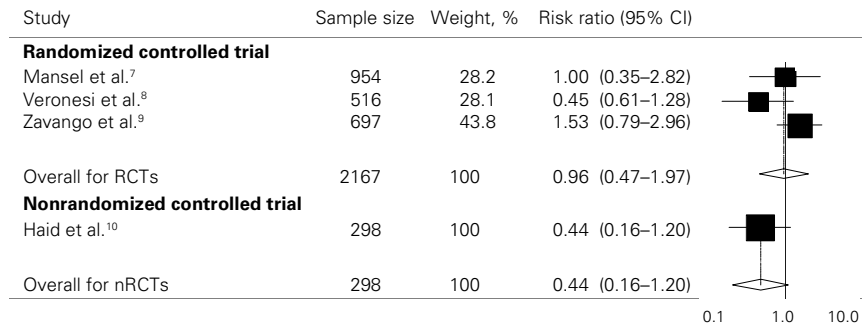

**Fig. S2.** Relative risk of death after axillary lymph node dissection (control surgery) or sentinel lymph node biopsy (experimental surgery) in randomized (RCTs) and nonrandomized trials (nRCTs).

DOI: 10.1503/cjs.023410

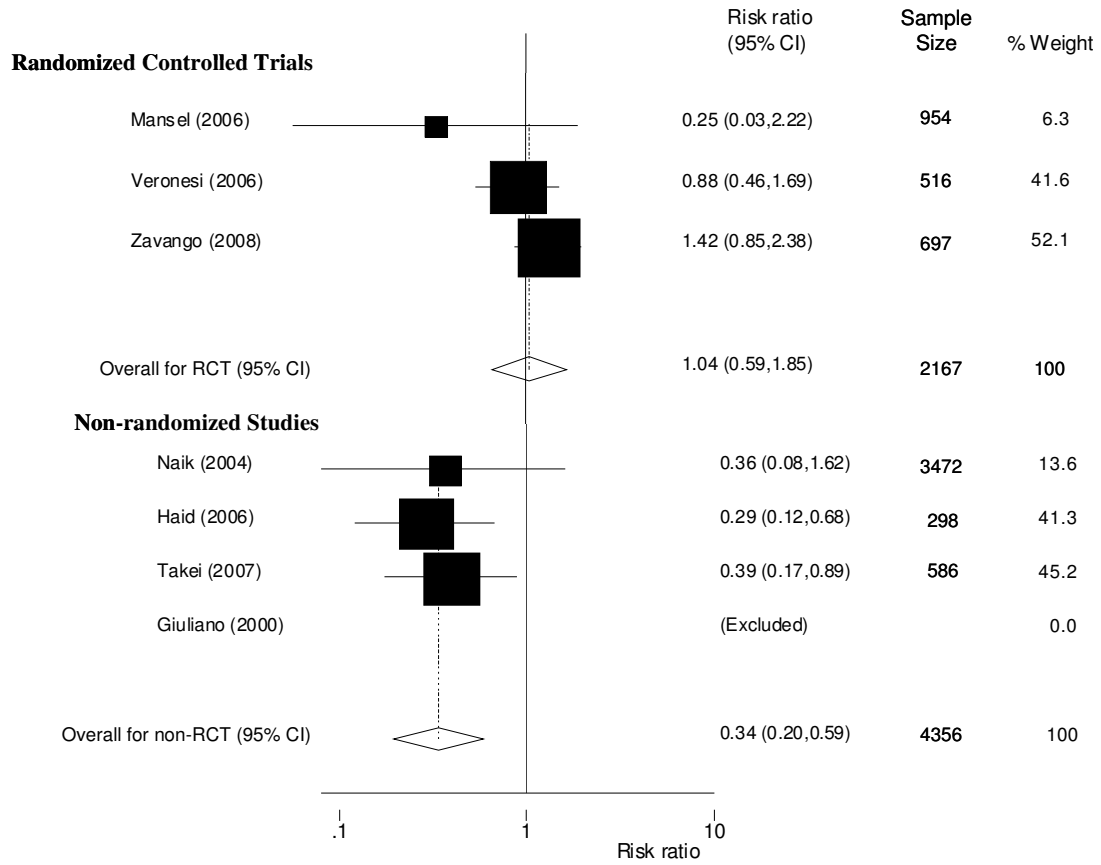

**Fig. S3.** Relative risk of recurrence after axillary lymph node dissection (control surgery) or sentinel lymph node biopsy (experimental surgery) in randomized (RCTs) and nonrandomized trials (nRCTs).

DOI: 10.1503/cjs.023410

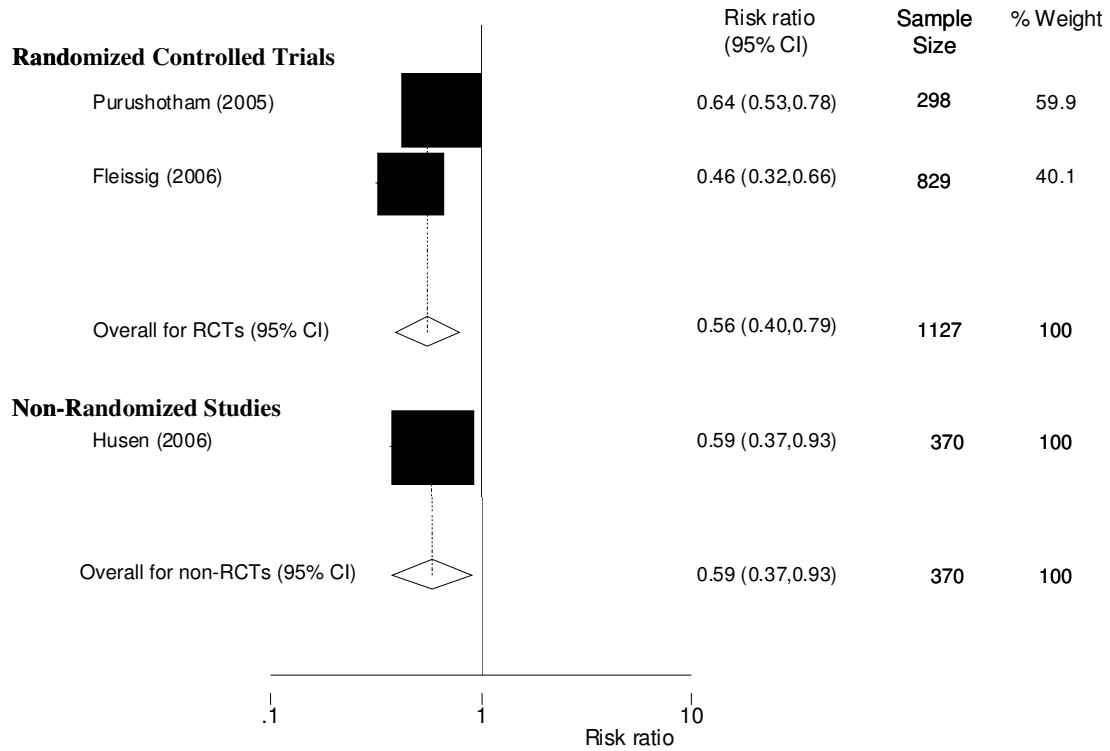

**Fig. S4.** Relative risk of axillary numbness after axillary lymph node dissection (control surgery) or sentinel lymph node biopsy (experimental surgery) in randomized (RCTs) and nonrandomized trials (nRCTs).

DOI: 10.1503/cjs.023410

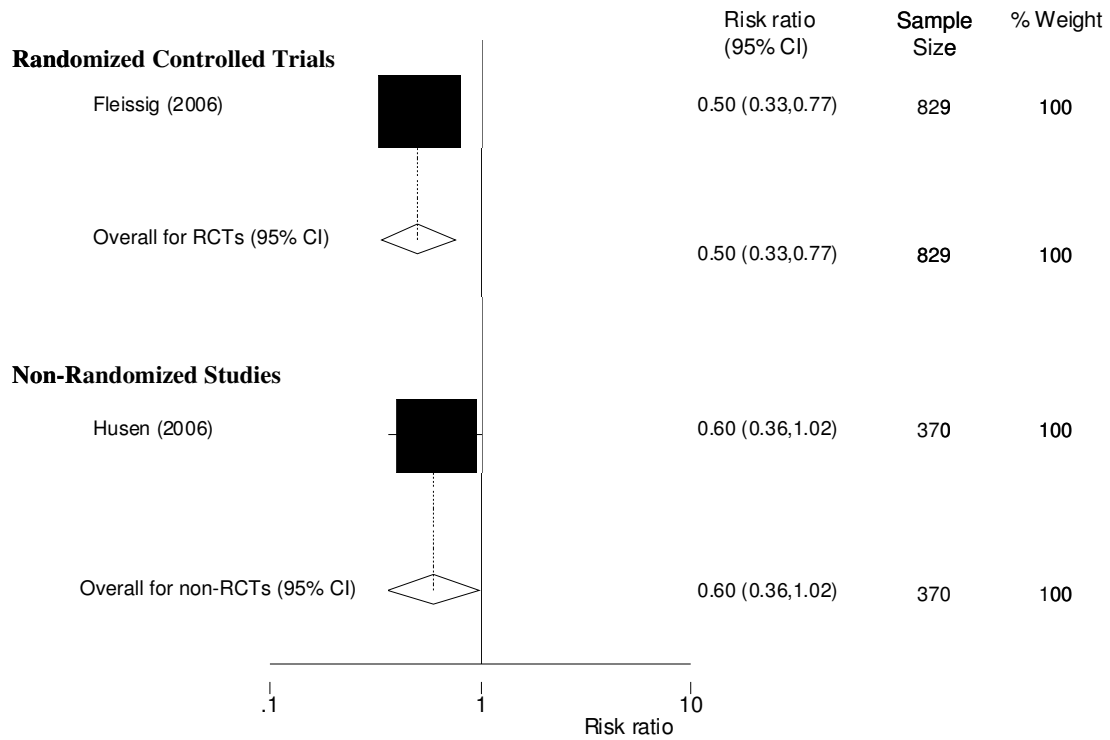

**Fig. S5.** Relative risk of arm swelling after axillary lymph node dissection (control surgery) or sentinel lymph node biopsy (experimental surgery) in randomized (RCTs) and nonrandomized trials (nRCTs).

DOI: 10.1503/cjs.023410

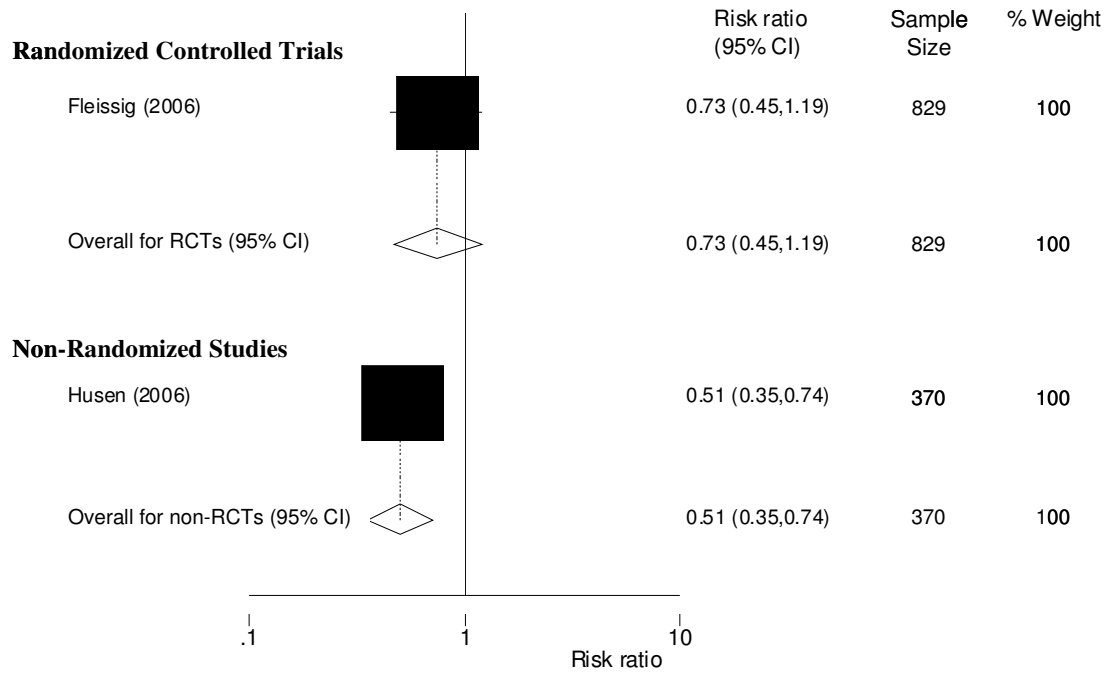

**Fig. S6.** Relative risk of reduced arm mobility after axillary lymph node dissection (control surgery) or sentinel lymph node biopsy (experimental surgery) in randomized (RCTs) and nonrandomized trials (nRCTs).

DOI: 10.1503/cjs.023410

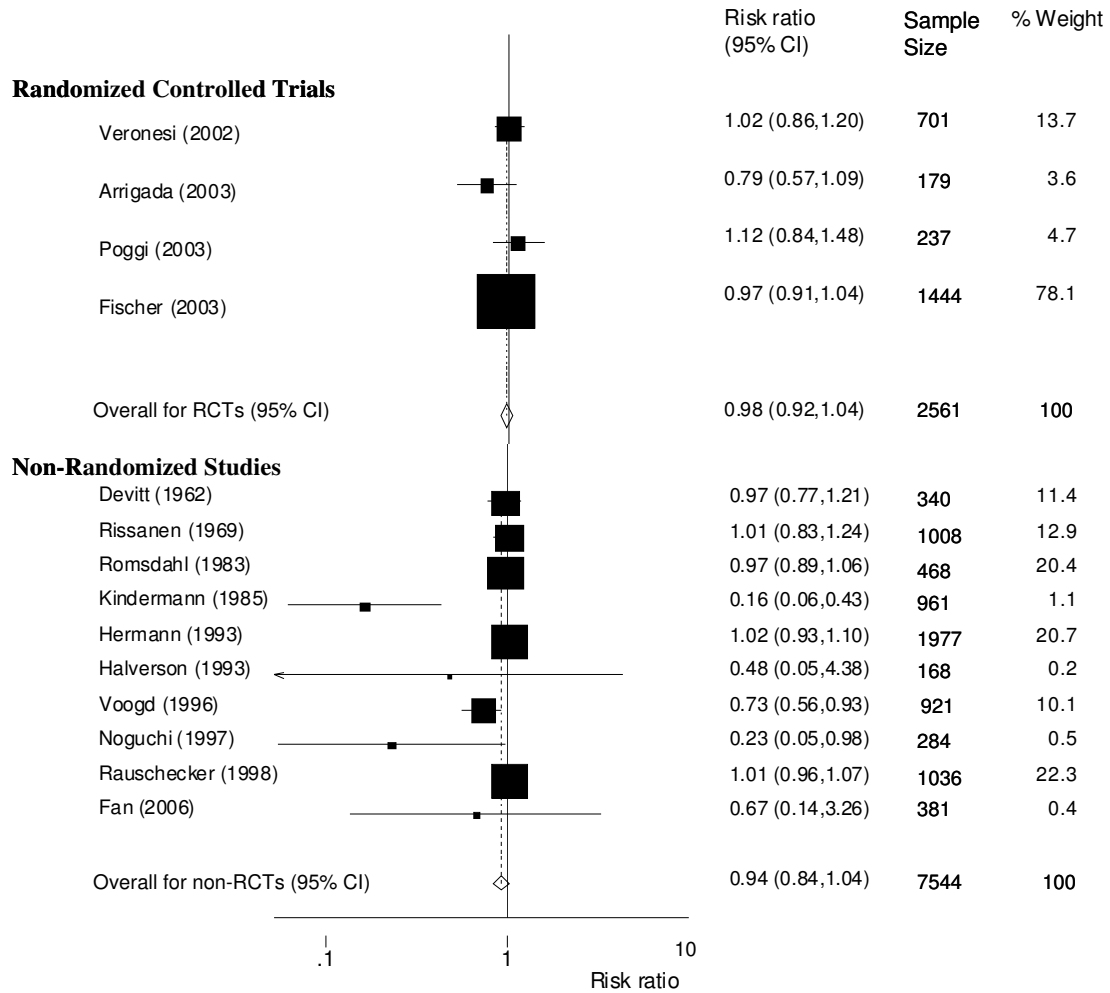

**Fig. S7.** Relative risk of death after mastectomy (control surgery) versus breast conserving therapy (experimental surgery) in randomized (RCTs) and nonrandomized trials (nRCTs).

DOI: 10.1503/cjs.023410

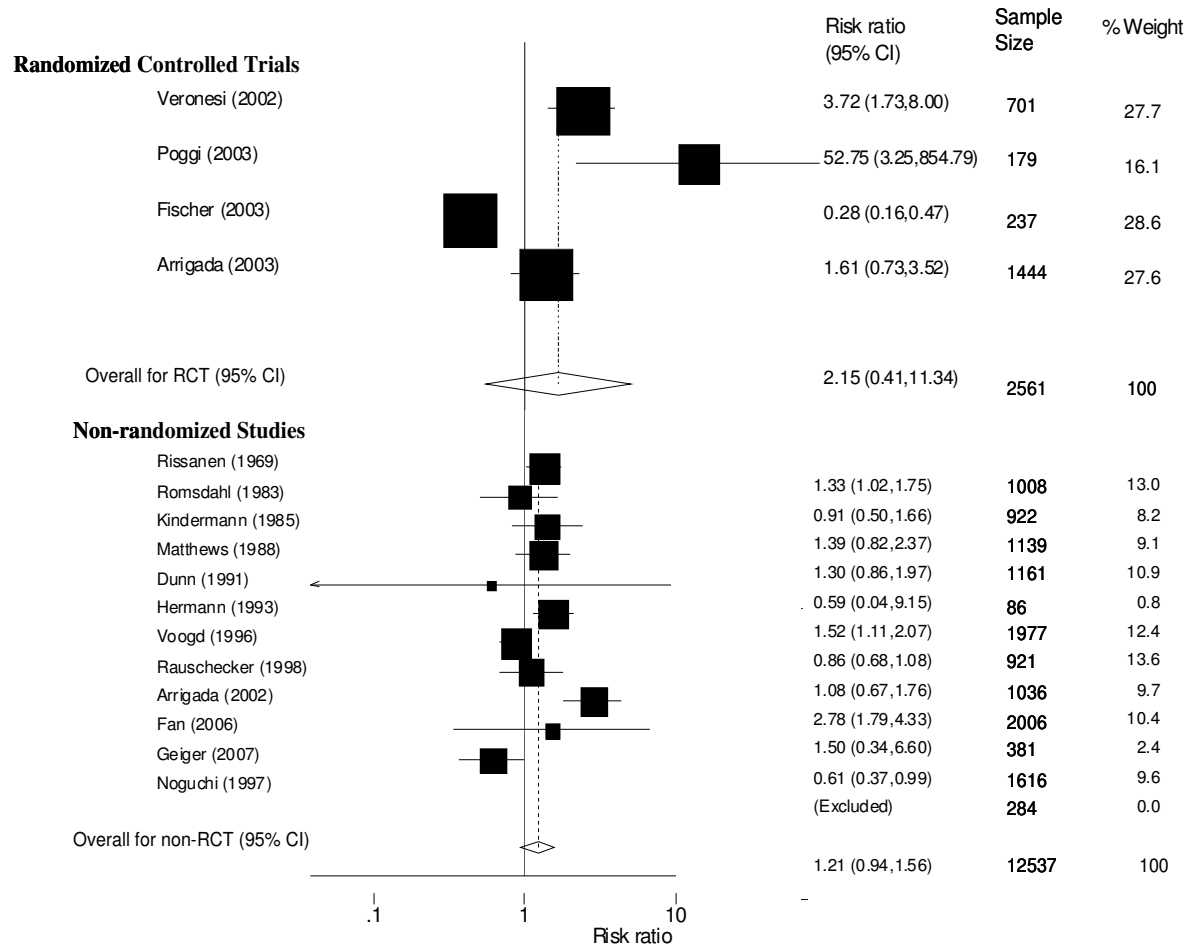

**Fig. S8.** Relative risk of recurrence after mastectomy (control surgery) versus breast conserving therapy (experimental surgery) in randomized (RCTs) and nonrandomized trials (nRCTs).

DOI: 10.1503/cjs.023410

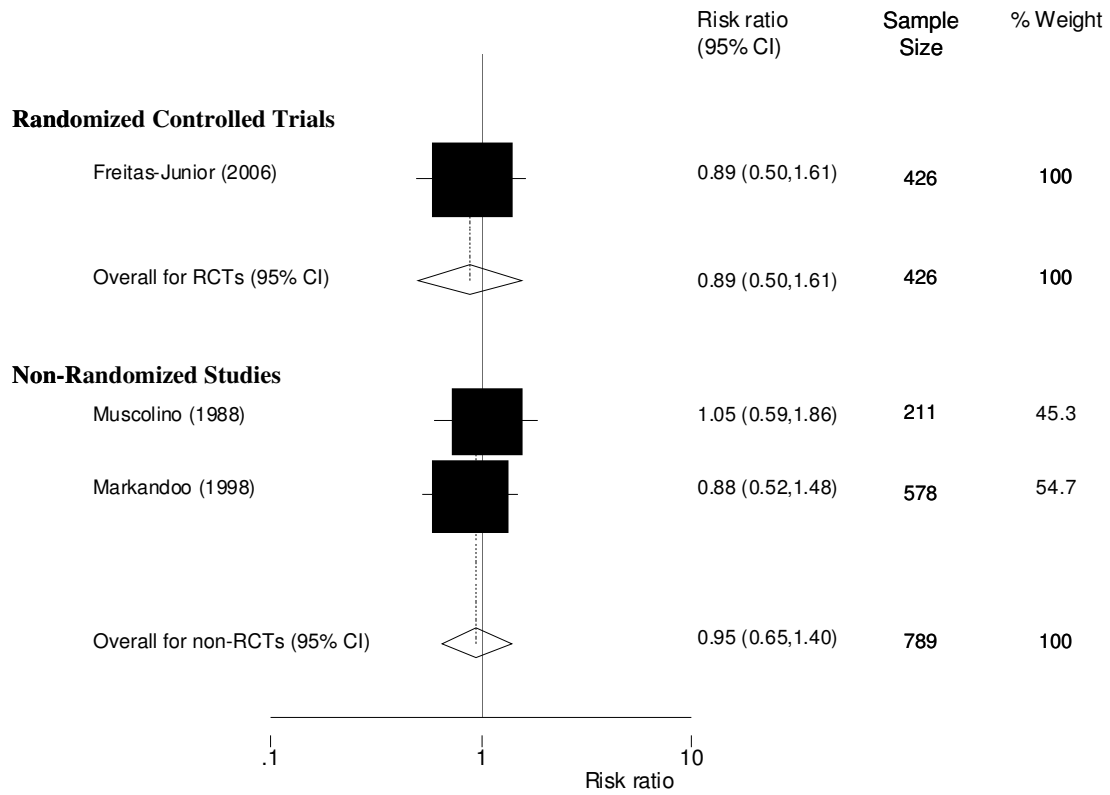

**Fig. S9.** Meta-analysis of total number of lymph nodes removed modified radical mastectomy with the pectoral muscle dissected (control surgery) versus preserved (experimental surgery) in randomized (RCTs) and nonrandomized trials (nRCTs).



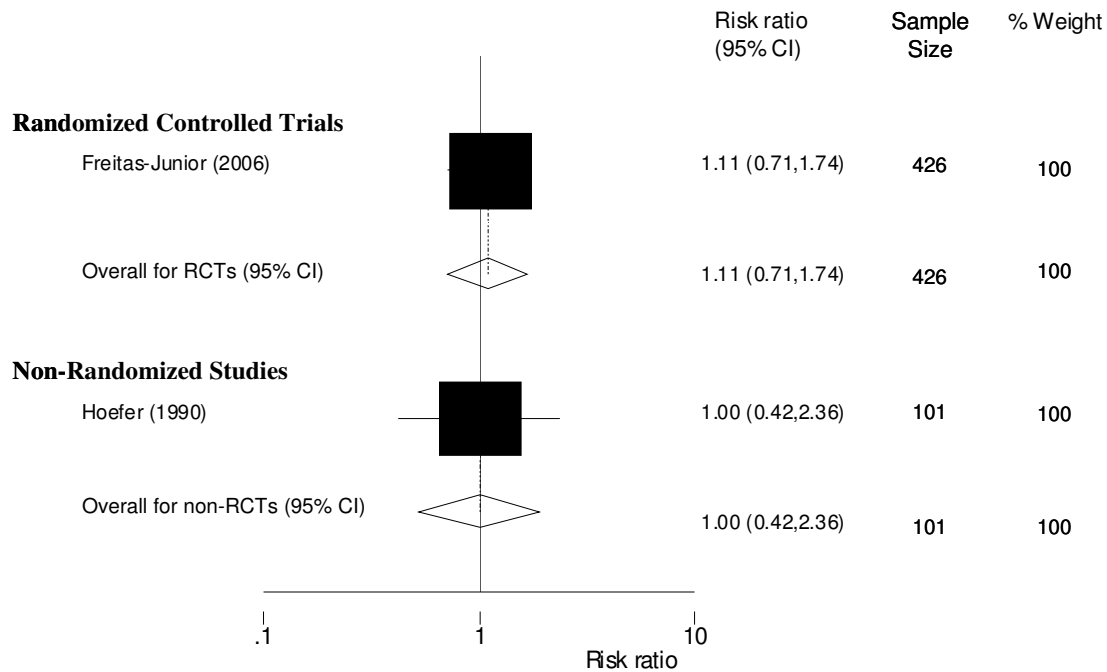

**Fig. S10.** Relative risk of complications after modified radical mastectomy with the pectoral muscle dissected (control surgery) versus preserved (experimental surgery) in randomized (RCTs) and nonrandomized trials (nRCTs).

References

1. Torresan RZ, Cabello C, Conde DM, et al. Impact of the preservation of the intercostobrachial nerve in axillary lymphadenectomy due to breast cancer. *Breast J* 2003;9:389-92.
2. Freeman SR, Washington SJ, Pritchard T, et al. Long term results of a randomised prospective study of preservation of the intercostobrachial nerve. *Eur J Surg Oncol* 2003;29:213-5.
3. Nishiki M, Yamane M, Amano K, et al. Evaluation of intercostobrachial nerve preservation in modified radical mastectomy for breast cancer — preliminary report on sensory disturbance test results. *Hiroshima J Med Sci* 1984;33:559-62
4. Temple WJ, Ketcham AS. Preservation of the intercostobrachial nerve during axillary dissection for breast cancer. *Am J Surg* 1985;150:585-8.
5. Paredes JP, Puente JL, Potel J. Variations in sensitivity after sectioning the intercostobrachial nerve. *Am J Surg* 1990;160:525-8.
6. Taylor KO. Morbidity associated with axillary surgery for breast cancer. *ANZ J Surg* 2004;74:314-7.
7. Mansel RE, Fallowfield L, Kissin M, et al. Randomized multicenter trial of sentinel node biopsy versus standard axillary treatment in operable breast cancer: the ALMANAC Trial. *J Natl Cancer Inst* 2006;98:599-609.
8. Veronesi U, Paganelli G, Viale G, et al. Sentinel-lymph-node biopsy as a staging procedure in breast cancer: update of a randomised controlled study. *Lancet Oncol* 2006;7:983-90.
9. Zavagno G, De Salvo GL, Scalco G, et al. A randomized clinical trial on sentinel lymph node biopsy versus axillary lymph node dissection in breast cancer: results of the Sentinella/GIVOM trial. *Ann Surg* 2008;247:207-13.
10. Haid A, Knauer M, Koberle-Wuhrer R, et al. Medium-term follow-up data after sentinel node biopsy alone for breast cancer. *Eur J Surg Oncol* 2006;32:1180-5.
